# Supplementary material
Source: publisher site journal article supplement (https://www.dovepress.com/article/379381)
Supplement: Supplementary file 1 [file 379381_1.docx]

**Supplementary Methods**

***Trier Social Stress Test***

Protocol is based on Narvaez Linares et al. (2020). We gave participants 5 minutes to prepare a 5-minute speech explaining why they were most qualified for their dream job. They could take notes to prepare but were informed they would not have access to their notes during the talk. Once preparation time had elapsed, two judges (one man and one woman) entered the room. Judges were undergraduate students trained in administering the TSST, wore lab coats, and kept a neutral expression throughout the test (i.e., could not provide any verbal encouragements or facial feedback). Before beginning the speech task, one of the judges (man) pointed out three cameras in the room, indicated that the talk would be recorded for subsequent behavioural analysis, and informed the participant that the judges would be taking notes during their talk. The judge (man) then asked the participant to stand up and deliver their speech. If the participant stopped talking for more than 5 seconds, a judge would prompt the participant by asking standardized questions on the topic. Afterwards, a 5-minute arithmetic task was initiated, which consisted of subtracting from 2043 in increments of 17. If a participant made a calculation error, a judge would state "Error" and request that the participant restart from 2043. During the debriefing session, we informed participants that the task was not recorded and that the cameras only served to induce further stress.

***Psychological Questionnaires***

**CESD-R.** Scores on the Center of Epidemiologic Studies Depression Scale – Revised version range from 0-60, with higher scores indicating more severe depressive symptoms. The English (Van Dam & Earleywine, 2011) and French (Morin et al., 2011) versions of the scale have shown adequate validity and reliability.

**GHQ-12.** We used the Likert system to score participants' responses (scores ranging from 0 to 36) on used the General Heath Questionnaire–12 item version, with higher scores indicating a higher possibility of psychological distress. Both the English (Lesage et al., 2011) and French (Salama-Younes et al., 2009) versions of the GHQ-12 have shown adequate validity and reliability.

***Neuropsychological Assessments***

**ACT.** During the Auditory Consonant Triagrams, participants were given a random set of 3 consonants, then asked to count down starting from a random number in increments of 3 for either 9, 18, or 36 seconds (except for the 0-second trials, in which consonants were repeated right away). After the time interval, participants had to repeat the 3 consonants. Each interval was tested 5 times with different sets of consonants. Higher scores on the ACT reflect better auditory working memory performance. The validity and reliability have been previously confirmed (Shura et al., 2016). To our knowledge, there is no French translation of the ACT. Consequently, instructions and administration were done in French, using the same consonant sets as the English version.

**CBS.** The Cambridge Brain Sciences (CBS; <https://www.cambridgebrainsciences.com/>) is an online cognitive assessment used to measure the participants' memory, reasoning, verbal ability, and concentration skills. A discussion between authors concluded that the results from the CBS will not be included, as concerns about the validity and reliability of online testing were raised.

**COWAT.** To measure phonemic fluency in the Controlled Oral Word Association Test, participants were asked to name as many words as possible starting by a given letter (F, A, S for the English version; T, N, P for the French version) within a 60-second time period (per letter). For semantic fluency, participants were required to name as many animals as possible in 60 seconds. Higher scores on those tests are indicative of greater verbal fluency abilities. Reliability and validity of semantic and verbal fluency tests have been well established for the English and French versions (Ross et al., 2007; Tombaugh et al., 1999).

**MoCA.** The Montréal Cognitive Assessment (MoCA) is scored out of 30 points, with a total score of < 26 used to indicate a mild cognitive impairment. The validity and reliability of the MoCA have been well documented (Freitas et al., 2012).

**RCFT.** The Rey Complex Figure Test and Recognition Trial was administered in four trials. First, participants were asked to copy the complex figure (copy trial) and then draw the figure from memory 3 min (immediate recall trial) and 30 min (delayed recall trial) after the completion of the copy trial. Right after the delayed recall trial, participants were asked to identify parts of the complex figure among other items that were not part of the original figure (recognition trial). The reliability and validity of the RCFT have been previously demonstrated (Tupler et al., 1995).

**TMT-A & B.** In Part A of the Trail Making Test, participants had to draw a line to connect the numbers on the page in chronological order. In Part B, participants had to alternate between connecting numbers and letters, in chronological and alphabetical order (e.g., 1-A-2-B). Scores obtained in Part A are subtracted from those obtained in Part B to obtain a global score of executive control. Both parts A and B were timed, with a shorter completion time indicative of basic numerical processing and executive function (i.e., cognitive flexibility, visual attention), respectively. The validity and reliability of the TMT A& B are well accepted (Wagner et al., 2011).

**Supplementary Results**

**Table S1**

*Medication intake.*

|  | HxMI  (n=11) | Hxs̅MI  (n=16) |
| --- | --- | --- |
| Medication for heart or blood vessels |  |  |
| ACT - Lisinopril | 1 | 0 |
| Apo-Metoprolol/ Metoprolol / Teva-metoprolol | 3 | 1 |
| Aldactone | 1 | 0 |
| Aspirin | 5 | 1 |
| Atrovastatin | 1 | 0 |
| Auro-Carvedilol | 1 | 0 |
| Bisoprolol / Sandoz-Bisoprolol | 2 | 0 |
| Candesartan | 1 | 0 |
| Clopidogrel/ Plavix | 4 | 0 |
| Dabigatran/Pradaxa | 0 | 1 |
| Diltiazem | 1 | 0 |
| Perindopril / PMS- Perindopril | 3 | 1 |
| Ramipril/Altace | 0 | 1 |
| Rivaroxaban/Xarelto | 1 | 0 |
| Rosuvastatin / Crestor | 6 | 3 |
| Sandoz-Candesartan | 1 | 0 |
| Sandoz-Termisartan | 0 | 1 |
| Tara-warfarin | 1 | 0 |
| Teva-perindopril | 1 | 0 |
| Ticagrelor/Brilinta | 0 | 1 |
| Medication for mental health (e.g., mood, anxiety) |  |  |
| Amitriptyline | 0 | 1 |
| Clonazepam/Klonopin | 0 | 1 |
| Duloxetine/Cymbalta | 0 | 1 |
| Escitalopram/Cipralex/Lexapro | 0 | 1 |
| Prochlorazine | 0 | 1 |
| Sertraline/Zoloft | 1 | 0 |
| Trazadone | 1 | 0 |
| Medication for breathing problems |  |  |
| Apo-Salvent | 1 | 0 |
| Budesonide/Pulmicort | 0 | 1 |
| Fluticasone | 0 | 1 |
| Zenhale | 1 | 0 |
| Medication for immune system |  |  |
| Apo-azathioprine | 0 | 1 |
| Celebrex | 1 | 0 |
| Meloxicam | 0 | 1 |
| Cyclosporine | 0 | 1 |
| Naproxen/Aleve/Apronax | 0 | 1 |
| Medication for diabetes |  |  |
| Dapagliflozin / Forxiga | 1 | 0 |
| Janumet/Sitagliptin/Metformin | 2 | 1 |
| Ratio-Metformin | 1 | 0 |
| Medication for cholesterol |  |  |
| Ezetimibe | 2 | 0 |
| Repatha | 1 | 0 |
| Medication for stomach related problems |  |  |
| Esomeprazole / Nexium | 0 | 1 |
| Famotidine | 1 | 0 |
| Omeprazole | 0 | 1 |
| Pantoprazole/Pantaloc | 4 | 0 |
| Tecta | 1 | 0 |
| Other medication |  |  |
| Acetaminophen / Tylenol | 1 | 2 |
| CBD oil | 1 | 0 |
| Ferrous Fumarate | 1 | 0 |
| Gabapentin/Neurontin | 0 | 1 |
| Levothryroxine/Synthroid | 1 | 4 |
| Leucovorin | 0 | 1 |
| Methotrexate | 0 | 1 |
| Pregabalin/Lyrica | 0 | 1 |
| Teva-Risedronate | 0 | 1 |
| Zopiclone/Imovane | 0 | 1 |
| Values are presented as n of cases. Data are self-reported. Two participants in the HxMI group opted not to share their medication intake. Four participants in the Hxs̅MI group were not taking any medication.  HxMI: Women with a history of myocardial infarction; Hxs̅MI: Women without a history of myocardial infarction | | |

**References**

Freitas, S., Simões, M. R., Marôco, J., Alves, L., & Santana, I. (2012). Construct Validity of the Montreal Cognitive Assessment (MoCA). *Journal of the International Neuropsychological Society*, *18*(2), 242–250. https://doi.org/10.1017/S1355617711001573

Lesage, F.-X., Martens-Resende, S., Deschamps, F., & Berjot, S. (2011). Validation of the General Health Questionnaire (GHQ-12) adapted to a work-related context. *Open Journal of Preventive Medicine*, *1*(2), 44–48. https://doi.org/10.4236/ojpm.2011.12007

Morin, A. J. S., Moullec, G., Maïano, C., Layet, L., Just, J.-L., & Ninot, G. (2011). Psychometric properties of the Center for Epidemiologic Studies Depression Scale (CES-D) in French clinical and nonclinical adults. *Revue D’epidemiologie Et De Sante Publique*, *59*(5), 327–340. https://doi.org/10.1016/j.respe.2011.03.061

Narvaez Linares, N. F., Charron, V., Ouimet, A. J., Labelle, P. R., & Plamondon, H. (2020). A systematic review of the Trier Social Stress Test methodology: Issues in promoting study comparison and replicable research. *Neurobiology of Stress*, *13*, 100235. https://doi.org/10.1016/j.ynstr.2020.100235

Ross, T. P., Calhoun, E., Cox, T., Wenner, C., Kono, W., & Pleasant, M. (2007). The reliability and validity of qualitative scores for the Controlled Oral Word Association Test. *Archives of Clinical Neuropsychology*, *22*(4), 475–488. https://doi.org/10.1016/j.acn.2007.01.026

Salama-Younes, M., Montazeri, A., Ismaïl, A., & Roncin, C. (2009). Factor structure and internal consistency of the 12-item General Health Questionnaire (GHQ-12) and the Subjective Vitality Scale (VS), and the relationship between them: A study from France. *Health and Quality of Life Outcomes*, *7*(1), 22. https://doi.org/10.1186/1477-7525-7-22

Shura, R. D., Rowland, J. A., & Miskey, H. M. (2016). Auditory Consonant Trigrams: A Psychometric Update†. *Archives of Clinical Neuropsychology: The Official Journal of the National Academy of Neuropsychologists*, *31*(1), 47–57. https://doi.org/10.1093/arclin/acv083

Tombaugh, T. N., Kozak, J., & Rees, L. (1999). Normative Data Stratified by Age and Education for Two Measures of Verbal Fluency: FAS and Animal Naming. *Archives of Clinical Neuropsychology*, *14*(2), 167–177. https://doi.org/10.1016/S0887-6177(97)00095-4

Tupler, L. A., Welsh, K. A., Asare-aboagye, Y., & Dawson, D. V. (1995). Reliability of the rey-osterrieth complex figure in use with memory-impaired patients. *Journal of Clinical and Experimental Neuropsychology*, *17*(4), 566–579. https://doi.org/10.1080/01688639508405146

Van Dam, N. T., & Earleywine, M. (2011). Validation of the Center for Epidemiologic Studies Depression Scale--Revised (CESD-R): Pragmatic depression assessment in the general population. *Psychiatry Research*, *186*(1), 128–132. https://doi.org/10.1016/j.psychres.2010.08.018

Wagner, S., Helmreich, I., Dahmen, N., Lieb, K., & Tadić, A. (2011). Reliability of Three Alternate Forms of the Trail Making Tests A and B. *Archives of Clinical Neuropsychology*, *26*(4), 314–321. https://doi.org/10.1093/arclin/acr024
